# Supplementary material
Source: publisher site journal article supplement (https://www.spandidos-publications.com/6852/downloadSupplementary)
Supplement: Supplementary file 1 [file downloadSupplementary]

## Sheet: STableVIII PC9-BrM3 Reg. Gene
Table SIX. Down- and upregulated genes in PC9-BrM3 cells compared to parental PC9 (PC9-P) that are converserly regulated by PSAT1 loss.
A, Downregulated gene list
Probe Id	Symbol	PC9-P	PC9-P	PC9-BrM3	PC9-BrM3	Fold-change	P-value	FDR
203186_s_at	S100A4	8.026	8.019	12.132	12.108	0.058	9.3e-06	0.000595
213895_at	EMP1	6.46	6.473	8.465	8.488	0.25	4.23e-05	0.00128
2028_s_at	E2F1	7.239	7.249	7.922	7.92	0.63	5.99e-05	0.00128
203967_at	CDC6	8.128	8.152	9.648	9.681	0.35	0.0001804	0.00289
204947_at	E2F1	6.187	6.164	7.735	7.687	0.35	0.0002938	0.00376
201147_s_at	TIMP3	7.56	7.488	9.445	9.444	0.26	0.0003604	0.00384
203851_at	IGFBP6	10.282	10.337	11.607	11.594	0.41	0.0004739	0.00433
202291_s_at	MGP	6.439	6.299	10.155	10.031	0.076	0.0006278	0.00502
204268_at	S100A2	8.566	8.538	9.911	10.004	0.38	0.0011892	0.00759
201288_at	ARHGDIB	10.513	10.404	12.336	12.265	0.28	0.00124	0.00759
201289_at	CYR61	10.677	10.561	12.262	12.24	0.32	0.0013043	0.00759
203729_at	EMP3	8.105	8.003	9.305	9.26	0.43	0.002061	0.00869
201325_s_at	EMP1	8.991	8.786	11.111	11.087	0.22	0.0021829	0.00869
202236_s_at	SLC16A1	9.929	9.895	10.94	10.854	0.51	0.0022034	0.00869
201324_at	EMP1	10.345	10.531	12.41	12.398	0.26	0.0022411	0.00869
219258_at	TIPIN	8.342	8.398	9.038	9.073	0.62	0.0023004	0.00869
221232_s_at	ANKRD2	7.274	7.143	8.755	8.833	0.33	0.0023081	0.00869
202613_at	CTPS1	8.982	8.951	10.097	9.98	0.48	0.0032158	0.0107
201149_s_at	TIMP3	7.743	7.637	8.633	8.604	0.53	0.003522	0.0107
215333_x_at	GSTM1	9.382	9.28	10.258	10.312	0.52	0.0036732	0.0107
219569_s_at	SLC35G2	8.496	8.567	9.439	9.359	0.55	0.0037331	0.0107
220651_s_at	MCM10	8.103	8.23	9.275	9.333	0.45	0.0037384	0.0107
218963_s_at	KRT23	6.061	5.685	8.896	8.948	0.12	0.0038444	0.0107
203892_at	WFDC2	10.582	10.496	11.213	11.232	0.62	0.0041411	0.011
202589_at	TYMS	11.226	11.17	11.935	11.857	0.62	0.0046521	0.0118
210764_s_at	CYR61	9.192	8.932	10.901	10.96	0.27	0.0050477	0.0118
207233_s_at	MITF	7.957	7.845	8.861	8.952	0.5	0.0051558	0.0118
213338_at	TMEM158	8.601	8.433	9.894	9.798	0.4	0.0052114	0.0118
204823_at	NAV3	6.593	6.648	8.284	8.542	0.29	0.0053826	0.0118
203968_s_at	CDC6	8.209	8.431	9.905	9.839	0.34	0.0055257	0.0118
201555_at	MCM3	9.8	9.832	10.855	10.711	0.51	0.005799	0.0118
201890_at	RRM2	11.307	11.444	12.26	12.256	0.54	0.005915	0.0118
204550_x_at	GSTM1	9.221	9.273	10.18	10.332	0.5	0.0062449	0.0118
219990_at	E2F8	8.857	9.029	10.034	10.025	0.47	0.0062586	0.0118
201150_s_at	TIMP3	7.547	7.381	9.507	9.222	0.27	0.0074336	0.0135
205428_s_at	CALB2	11.456	11.31	12.315	12.25	0.54	0.0077747	0.0135
202234_s_at	SLC16A1	7.769	7.946	9.134	9.011	0.43	0.0078096	0.0135
207390_s_at	SMTN	7.164	7.306	8.075	8.027	0.57	0.0083259	0.014
203725_at	GADD45A	9.186	8.812	10.838	10.873	0.28	0.0100549	0.0165
219305_x_at	FBXO2	7.912	7.68	9.294	9.117	0.38	0.0105589	0.0167
220892_s_at	PSAT1	9.972	9.759	10.897	10.958	0.48	0.0106997	0.0167
206924_at	IL11	6.951	6.592	8.628	8.844	0.26	0.0111781	0.017
219000_s_at	DSCC1	7.4	7.576	8.477	8.35	0.53	0.0134017	0.0199
209900_s_at	SLC16A1	8.421	8.632	9.683	9.915	0.41	0.0148763	0.0216
213358_at	MTCL1	7.749	7.792	8.785	8.556	0.54	0.0163332	0.0226
206421_s_at	SERPINB7	6.601	7.042	8.559	8.504	0.31	0.0164987	0.0226
203234_at	UPP1	10.564	10.485	11.489	11.278	0.55	0.0167087	0.0226
204115_at	GNG11	9.935	10.163	10.936	11.029	0.52	0.016926	0.0226
206102_at	GINS1	9.645	9.704	10.278	10.453	0.62	0.0173311	0.0226
219722_s_at	GDPD3	7.748	7.75	8.187	8.326	0.7	0.0184139	0.0235
202800_at	SLC1A3	6.106	6.497	8.186	7.901	0.3	0.0186946	0.0235
209191_at	TUBB6	9.405	9.229	9.941	9.987	0.64	0.0193509	0.0238
202235_at	SLC16A1	6.441	6.712	7.568	7.746	0.47	0.0217771	0.0263
221958_s_at	WLS	8.054	8.241	8.756	8.711	0.67	0.0259358	0.0302
209662_at	CETN3	10.026	9.943	10.529	10.723	0.64	0.0259574	0.0302
205015_s_at	TGFA	5.856	6.21	7.023	7.062	0.5	0.0296799	0.0339
204149_s_at	GSTM4	7.672	7.158	9.15	8.896	0.33	0.0302841	0.034
213523_at	CCNE1	7.299	7.484	8.592	8.26	0.49	0.0321224	0.0354
205016_at	TGFA	10.192	10.53	11.309	11.509	0.48	0.0332913	0.036
209260_at	SFN	10.586	10.403	11.038	11.18	0.65	0.0337744	0.036
204617_s_at	ACD	9.156	9.153	9.932	9.676	0.64	0.0369686	0.0388
209101_at	CTGF	7.037	6.781	7.599	7.856	0.57	0.0459205	0.0474
210912_x_at	GSTM4	7.438	7.448	8.084	8.46	0.56	0.0476707	0.0484
204346_s_at	RASSF1	6.557	6.855	7.506	7.357	0.6	0.0487929	0.0488
B, Upregulated gene list
Probe Id	Symbol	PC9-P	PC9-P	PC9-BrM3	PC9-BrM3	Fold-change	P-value	FDR
221016_s_at	TCF7L1	8.625	8.573	6.321	6.233	5	0.0004863	0.0089
203535_at	S100A9	12.213	12.106	9.423	9.349	6.84	0.0005501	0.0089
217202_s_at	GLUL	9.386	9.388	8.37	8.422	1.99	0.0006851	0.0089
200648_s_at	GLUL	9.219	9.291	8.163	8.139	2.15	0.0011675	0.0089
212614_at	ARID5B	10.662	10.564	8.203	8.059	5.59	0.0012229	0.0089
210176_at	TLR1	8.273	8.242	6.888	6.981	2.5	0.0013693	0.0089
212830_at	MEGF9	10.898	10.844	9.957	10.017	1.85	0.0020428	0.00977
202831_at	GPX2	12.73	12.665	11.925	11.957	1.69	0.002245	0.00977
209173_at	AGR2	11.515	11.401	10.08	10.009	2.66	0.002254	0.00977
207037_at	TNFRSF11A	7.569	7.631	6.059	6.198	2.77	0.0026468	0.0103
209182_s_at	C10orf10	8.482	8.234	6.192	6.116	4.61	0.0034453	0.0122
215001_s_at	GLUL	11.874	11.913	10.958	11.08	1.83	0.0053503	0.0149
218532_s_at	FAM134B	8.7	8.819	7.914	7.948	1.78	0.0055307	0.0149
215820_x_at	SNX13	6.299	6.339	5.839	5.771	1.43	0.0057613	0.0149
212870_at	SOS2	8.262	8.352	7.196	7.336	2.06	0.0063567	0.0149
203702_s_at	TTLL4	10.423	10.503	8.362	8.004	4.86	0.0064178	0.0149
202357_s_at	CFB	7.68	7.62	7.185	7.132	1.41	0.0066194	0.0149
205382_s_at	CFD	9.027	9.046	8.012	7.826	2.17	0.0068787	0.0149
221760_at	MAN1A1	7.606	7.681	5.994	5.641	3.55	0.0095988	0.018
203703_s_at	TTLL4	7.961	8.233	5.801	6.14	4.37	0.01028	0.018
219044_at	THNSL2	7.969	7.852	7.329	7.343	1.49	0.0104406	0.018
201236_s_at	BTG2	7.96	8.071	6.973	7.143	1.94	0.0111124	0.018
204597_x_at	STC1	6.511	6.317	3.355	2.651	10.64	0.0112912	0.018
204595_s_at	STC1	7.366	7.445	6.489	6.651	1.78	0.0114145	0.018
219032_x_at	OPN3	11.139	10.892	9.87	9.807	2.26	0.0115139	0.018
204942_s_at	ALDH3B2	9.364	9.338	8.271	7.996	2.32	0.0126268	0.0189
219768_at	VTCN1	7.785	7.774	6.372	6.665	2.4	0.0132036	0.0191
208988_at	KDM2A	10.492	10.35	9.829	9.821	1.51	0.014035	0.0195
204941_s_at	ALDH3B2	7.75	7.592	6.721	6.884	1.83	0.0165402	0.0222
201010_s_at	TXNIP	12.284	12.099	11.231	10.997	2.11	0.0186	0.0242
209990_s_at	GABBR2	9.13	9.014	7.829	8.119	2.14	0.0197297	0.0248
201009_s_at	TXNIP	10.373	10.641	9.587	9.475	1.97	0.0214876	0.0262
201008_s_at	TXNIP	10.969	10.64	9.516	9.682	2.31	0.022627	0.0265
217077_s_at	GABBR2	7.37	7.355	6.131	6.462	2.09	0.023293	0.0265
212136_at	ATP2B4	9.731	9.792	9.025	9.217	1.56	0.0237516	0.0265
218858_at	DEPTOR	7.149	7.205	6.489	6.218	1.77	0.0271216	0.0288
220283_at	HHIPL2	8.812	8.897	7.618	7.967	2.09	0.0274148	0.0288
209183_s_at	C10orf10	9.581	10.125	8.2	7.91	3.48	0.0281042	0.0288
217979_at	TSPAN13	11.662	11.863	11.243	11.268	1.42	0.0375928	0.0376
